# Supplementary material for: Ultra-narrow blue phosphorene nanoribbons for tunable optoelectronics
Source: Royal Society of Chemistry journal article supplement (doi:10.1039/c6ra26253h), 2017-01-01
Supplement: c6ra26253h1.pdf [file c6ra26253h1.pdf]

## Supplementary Information

### Ultra-narrow Blue Phosphorene Nanoribbons for Tunable Optoelectronics

Ram Swaroop<sup>1</sup>, P. K. Ahluwalia<sup>2</sup>, K. Tankeshwar<sup>3</sup> and Ashok Kumar<sup>1\*</sup>

*<sup>1</sup>Centre for Physical sciences, School of Basic and Applied Sciences, Central University of Punjab,  
Bathinda, Punjab, 151001, India*

*<sup>2</sup>Department of Physics, Himachal Pradesh University, Shimla, Himachal Pradesh, 171005, India*

*<sup>3</sup>Department of Physics, Guru Jambheshwar University of Science and Technology, Hisar, Haryana,  
125001*

(Nov 27, 2016)

\*Corresponding author:

Ashok Kumar ([ashok@cup.ac.in](mailto:ashok@cup.ac.in))

**H-ABPNR**

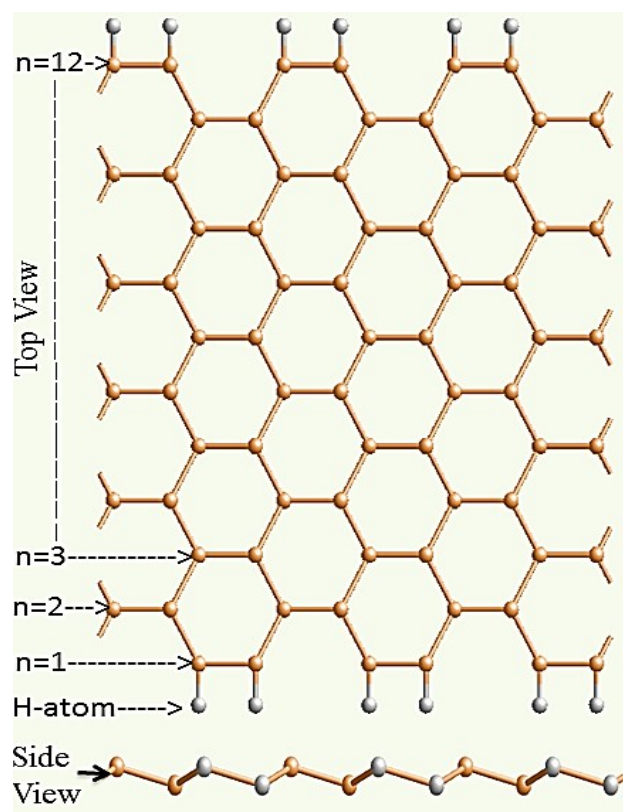

**H-ZBPNR**

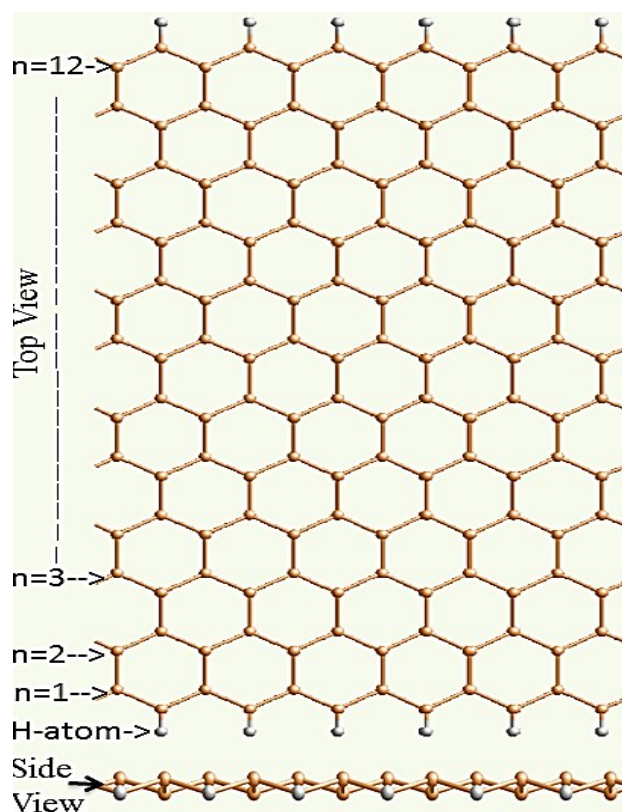

**Figure S1:** Top and Side view of H-ABPNR and H- ZBPNR for the widest ribbon (n=12) considered in the study.

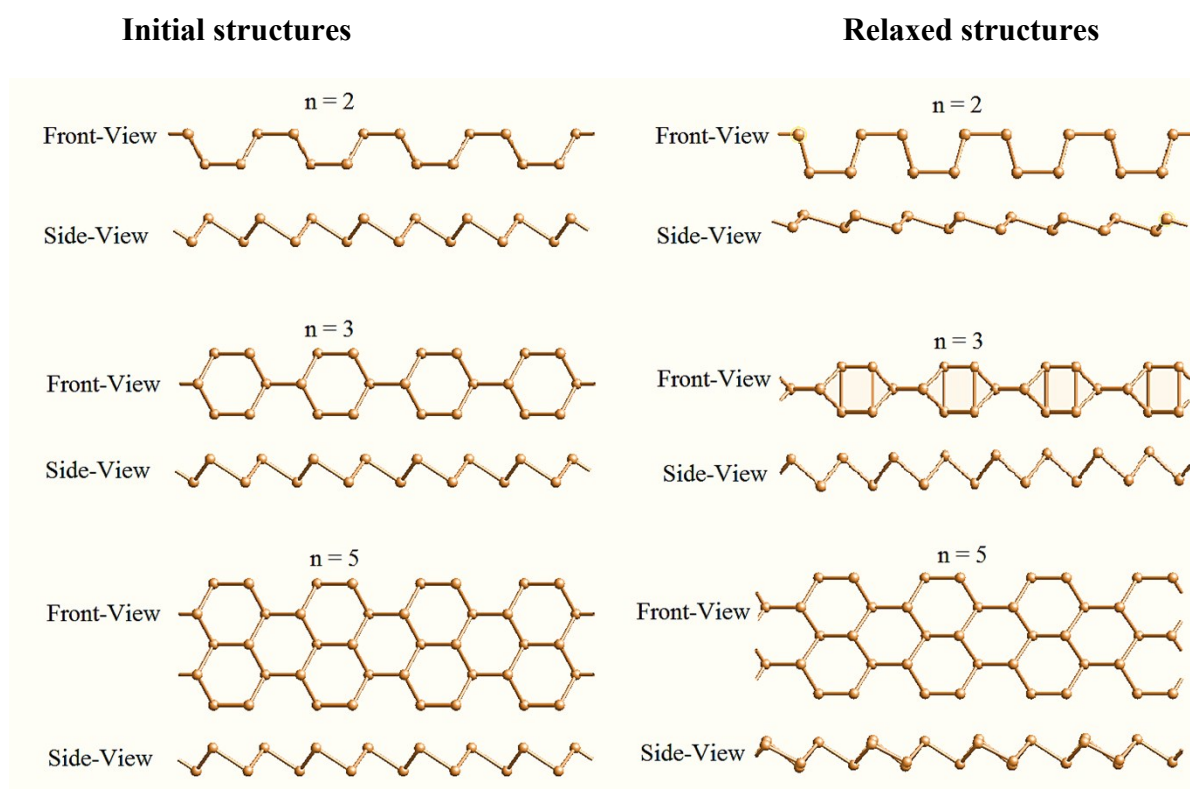

**Figure S2:** Initial and fully relaxed structures of ABPNR at width  $n = 2, 3, 5$ . The reconstruction of edge atoms can be seen in relaxed structures.

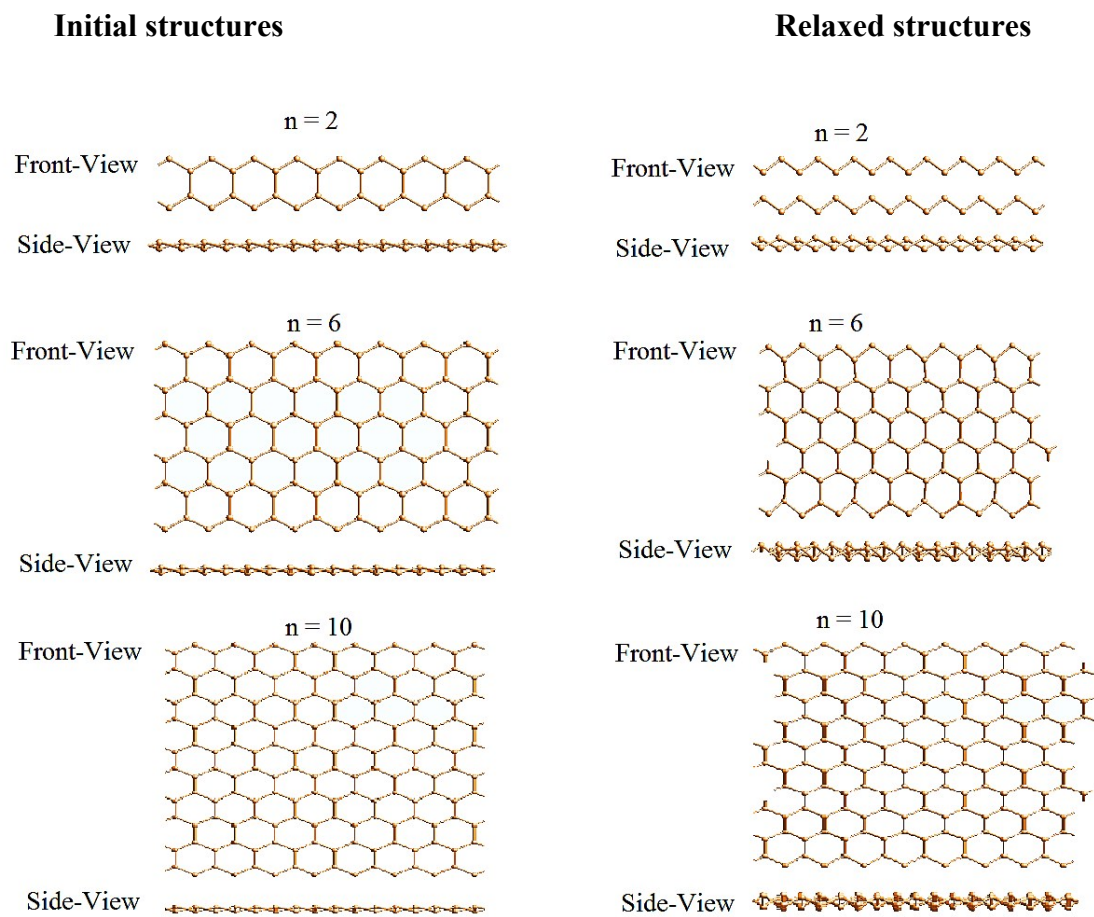

**Figure S3:** Initial and fully relaxed structures of ZBPNR at width  $n = 2, 3, 5$ . The reconstruction of edge atoms can be seen in relaxed structures.

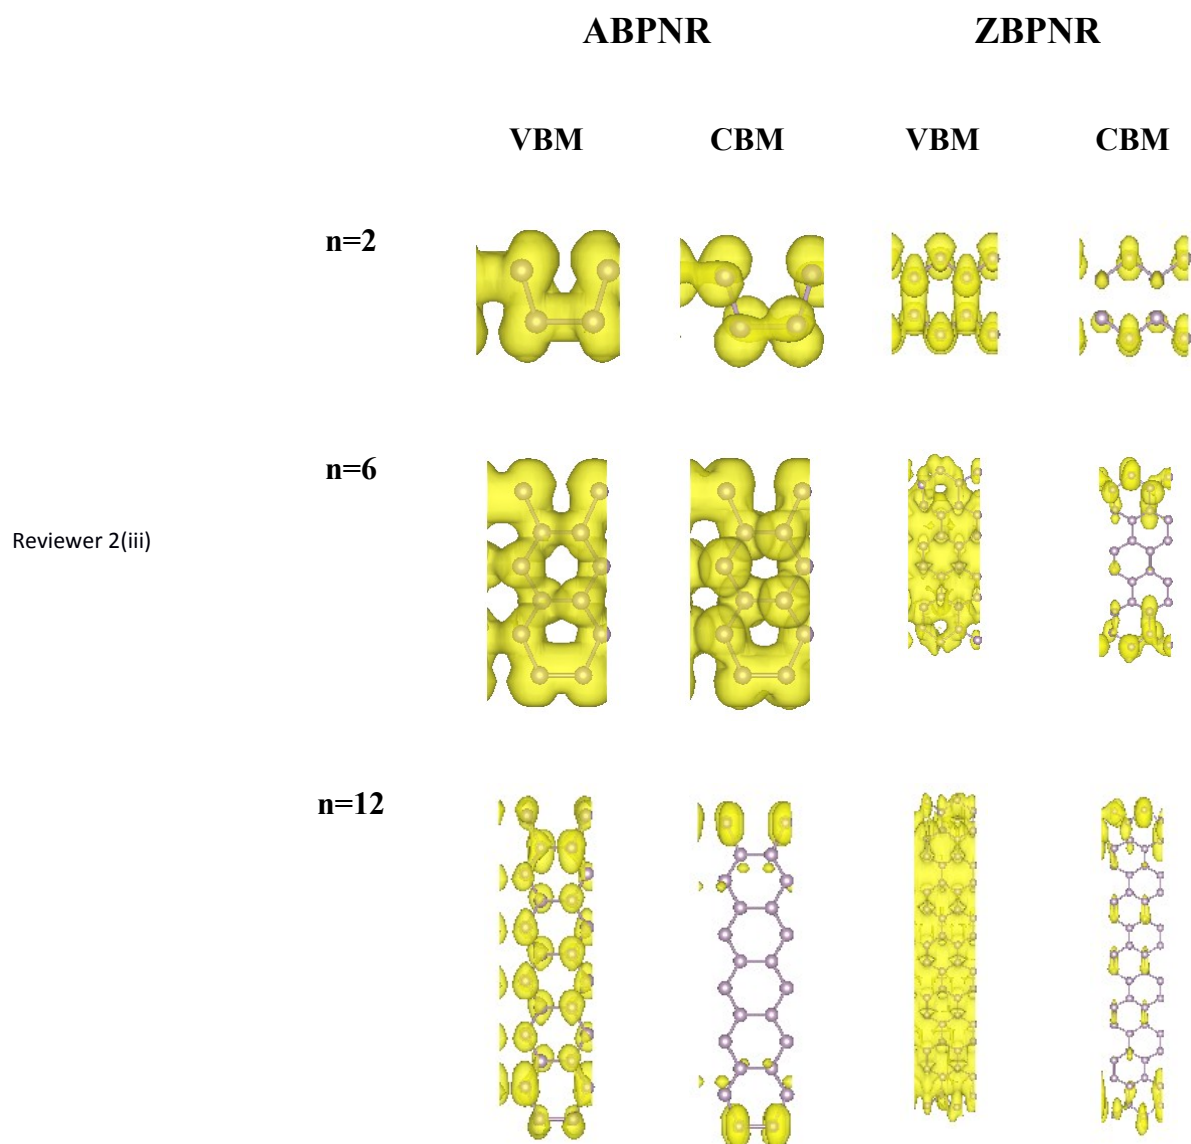

**Figure S4:** Valance band maxumum (VBM) and conduction band minimum (CBM) charge density for width  $n=2, 6$  and  $12$  of bare BPNRs. The iosurface value is set at  $10^{-3} \text{ e}/\text{\AA}^3$ .

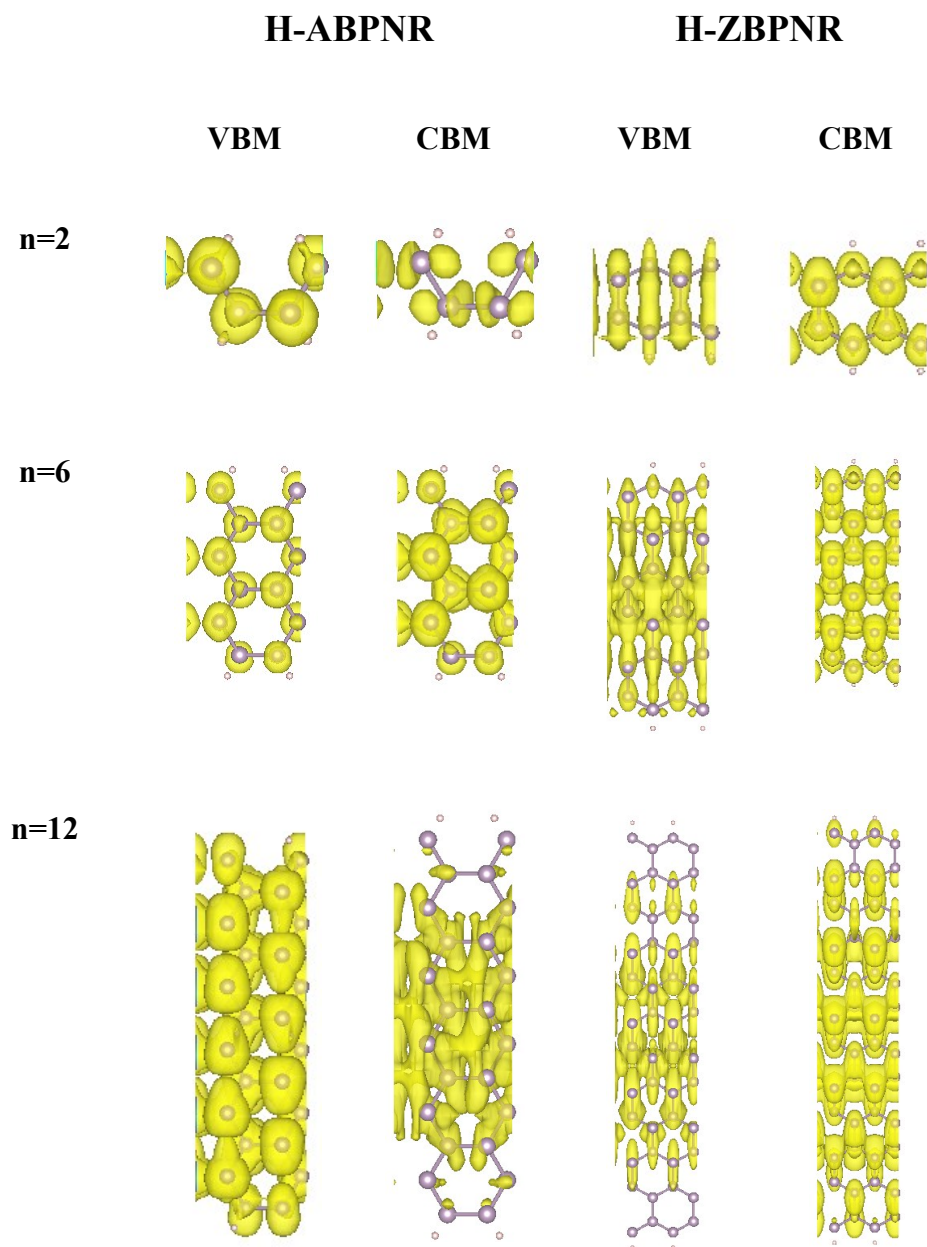

Reviewer 2(iii)

**Figure S5:** Valance band maxumum (VBM) and conduction band minimum (CBM) charge density for width  $n=2, 6$  and  $12$  of passivated BPNRs. The iosurface value is set at  $10^{-7} \text{ e}/\text{\AA}^3$ .

**Table T1:** Plasmonic energy (eV) of  $\pi+\sigma$  structure peak for smallest width (n=2) and widest width (n=12) BPNRs. The plasmonic energy at 2% and at ultimate tensile strength (UTS) of widest width BPNR is also given.

|                | $\pi+\sigma$ plasmonic energy (eV) |             |           |               |
|----------------|------------------------------------|-------------|-----------|---------------|
|                | <b>n=2</b>                         | <b>n=12</b> | <b>2%</b> | <b>at UTS</b> |
| <b>ABPNR</b>   | 5.8                                | 8.4         | 8.3       | 6.3           |
| <b>H-ABPNR</b> | 6.8                                | 8.8         | 8.6       | 6.5           |
| <b>ZBPNR</b>   | 6.0                                | 8.6         | 8.4       | 6.4           |
| <b>H-ZBPNR</b> | 6.3                                | 8.5         | 8.2       | 6.3           |
